# Supplementary material for: Artificial intelligence assisted thermoelectric materials design and discovery
Source: Research Square preprint supplement (doi:10.21203/rs.3.rs-1898309/v1), 2022-08-04
Supplement: Supplementary file 1 [file 399db9ab7d16d75652b9c3fe.pdf]

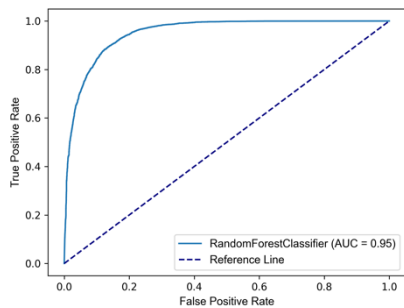

(a) p-type Seebeck coefficient

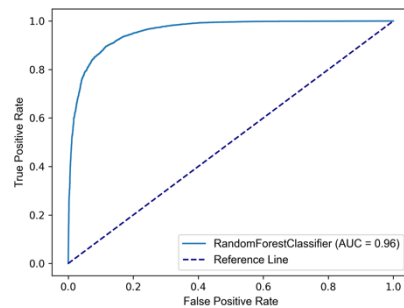

(b) n-type Seebeck coefficient

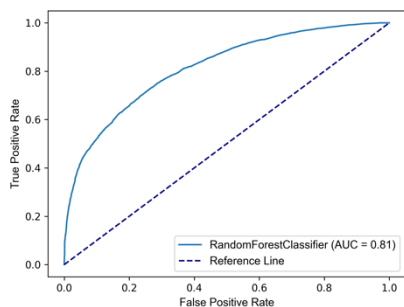

(c) p-type power factor

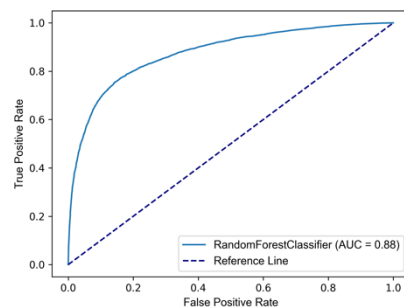

(d) n-type power factor

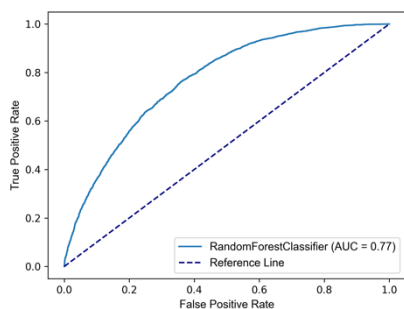

(e) p-type electrical conductivity

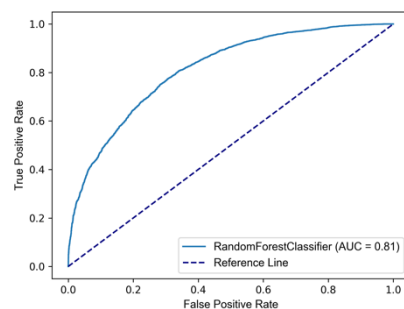

(f) n-type electrical conductivity

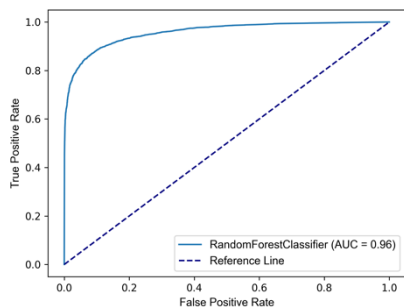

(g) p-type thermal conductivity

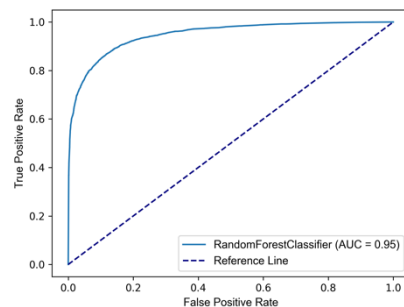

(h) n-type thermal conductivity

Figure S1. Classification ROC curves for TE materials from Materials Project database with the best classification performance. The reference lines show the random classification line with an AUC 0.5.

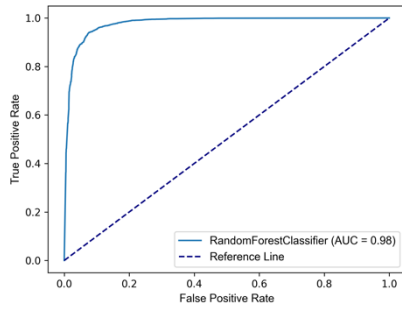

(a) p-type Seebeck coefficient

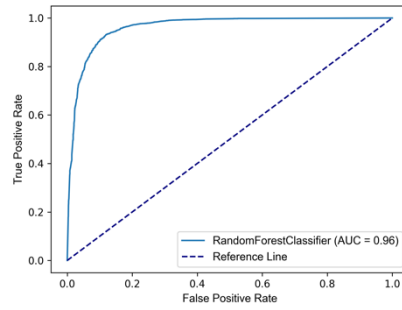

(b) n-type Seebeck coefficient

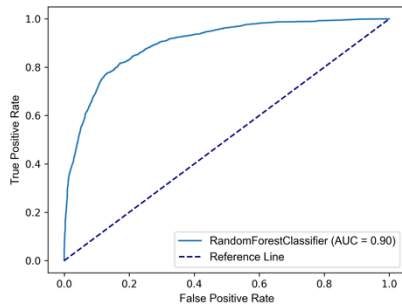

(c) p-type power factor

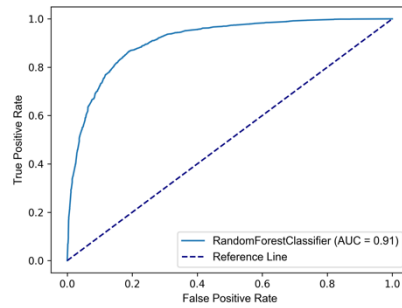

(d) n-type power factor

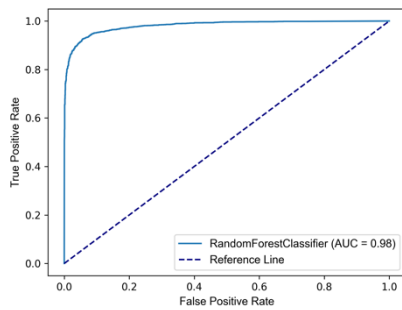

(e) p-type electrical conductivity

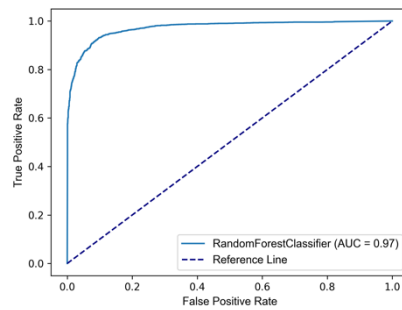

(f) n-type electrical conductivity

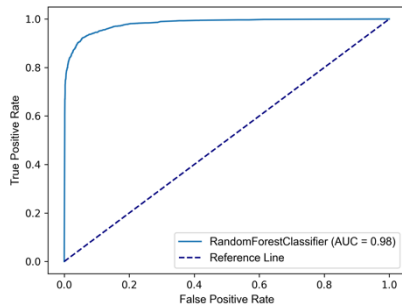

(g) p-type thermal conductivity

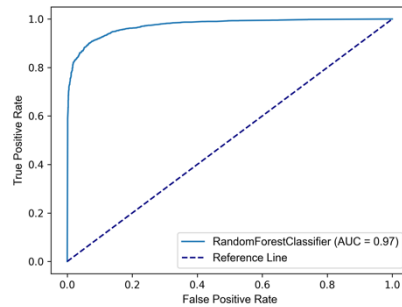

(h) n-type thermal conductivity

Figure S2. Classification ROC curves for TE materials from Jarvis database with the best classification performance. The reference lines show the random classification line with an AUC 0.5.
